# Supplementary material for: Trends and social differentials in child mortality in Rwanda 1990–2010: results from three demographic and health surveys
Source: HighWire-hosted journal article supplement (doi:10.1136/jech-2014-204657), 2015-04-13
Supplement: jech-2014-204657supp.pdf [file jech-2014-204657supp.pdf]

## Supplementary materials

Table S1. Socio-demographic characteristics of mothers, households, and children. Data from three Demographic and Health Surveys, Rwanda, 1990 to 2010 (live births)

| <i>Follow-up period</i>                  | <i>1990–1994</i>  | <i>1995–1999</i>   | <i>2000–2004</i>  | <i>2005–2010</i>    |
|------------------------------------------|-------------------|--------------------|-------------------|---------------------|
| Maternal education                       |                   |                    |                   |                     |
| Secondary or higher                      | 6.7<br>(492/7356) | 10<br>(803/7833)   | 8.4<br>(737/8753) | 8.8<br>(954/10 848) |
| Primary                                  | 47<br>(3439/7356) | 55<br>(4298/7833)  | 63<br>(5533/8753) | 71<br>(7751/10 848) |
| No formal education                      | 46<br>(3425/7356) | 35<br>(2732/7833)  | 29<br>(2483/8753) | 20<br>(2143/10 848) |
| Maternal residence                       |                   |                    |                   |                     |
| Urban                                    | 11<br>(836/7356)  | 15<br>(1166/7833)  | 14<br>(1247/8753) | 12<br>(1292/10 848) |
| Rural                                    | 89<br>(6520/7356) | 85<br>(6667/7833)  | 86<br>(7506/8753) | 88<br>(9556/10 848) |
| Maternal age (years)                     |                   |                    |                   |                     |
| < 20                                     | 8.0<br>(590/7356) | 8.7<br>(678/7833)  | 6.5<br>(566/8753) | 6.2<br>(668/10 848) |
| 20 to 34                                 | 74<br>(5414/7356) | 70<br>(5506/7833)  | 73<br>(6360/8753) | 76<br>(8231/10 848) |
| > 34                                     | 18<br>(1352/7356) | 21<br>(1649/7833)  | 21<br>(1827/8753) | 18<br>(1949/10 848) |
| Birth order                              |                   |                    |                   |                     |
| 1 <sup>st</sup> birth                    | 19<br>(1383/7356) | 21<br>(1674/7833)  | 18<br>(1615/8753) | 24<br>(2644/10 848) |
| 2 <sup>nd</sup> to 6 <sup>th</sup> birth | 65<br>(4772/7356) | 62<br>(4814/7833)  | 65<br>(5681/8753) | 64<br>(6891/10 848) |
| > 6 <sup>th</sup> birth                  | 16<br>(1201/7356) | 17<br>(1345/7833)  | 17<br>(1457/8753) | 12<br>(1313/10 848) |
| Sex of child                             |                   |                    |                   |                     |
| Male                                     | 50<br>(3705/7356) | 50<br>(3912/7833)  | 51<br>(4464/8753) | 51<br>(5498/10 848) |
| Female                                   | 50<br>(3651/7356) | 50<br>(3921/78533) | 49<br>(4289/8753) | 49<br>(5350/10 848) |

Data are percent (n/n). Data weighted using sample weight factor from Demographic and Health Surveys to obtain representative nationwide estimates

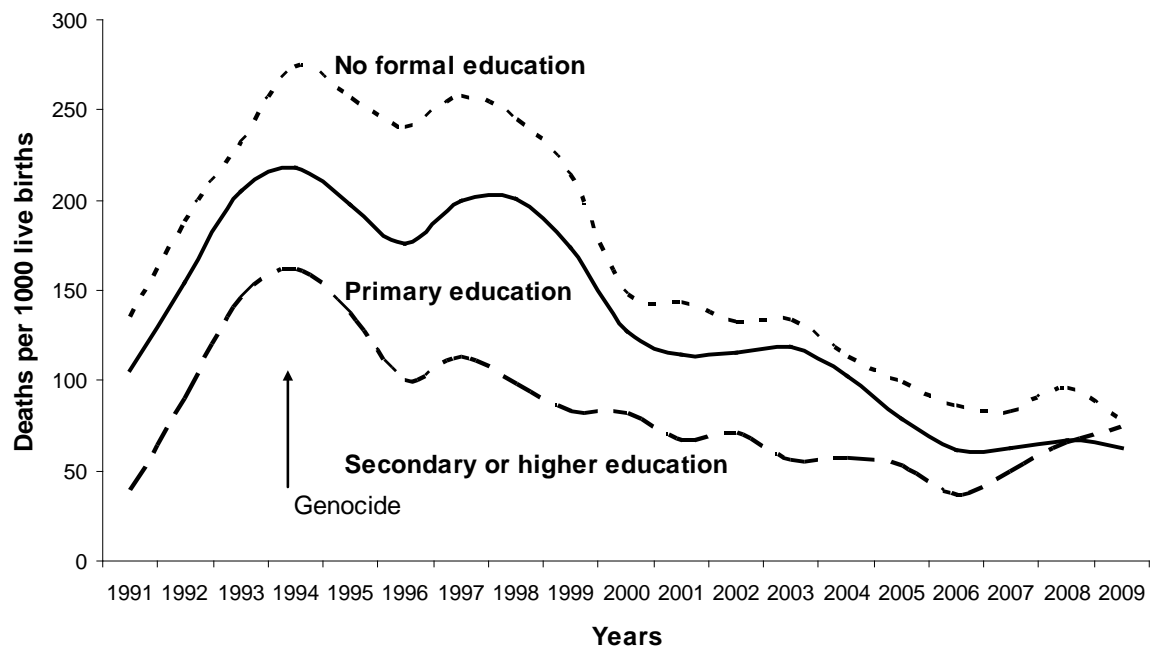

Figure S1 Under-five mortality rates in Rwanda (3-year moving averages) according to level of maternal education, 1990 to 2010. Analysis of Demographic and Health Surveys data

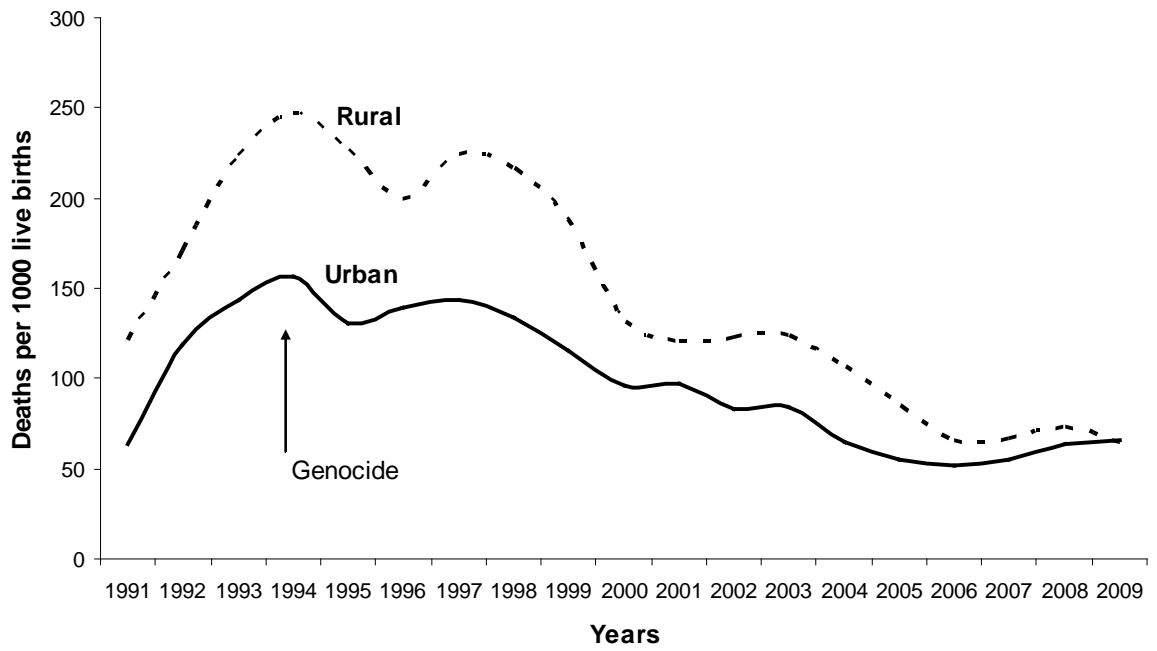

Figure S2 Under-five mortality rates in Rwanda (3-year moving averages) according to maternal residence, 1990 to 2010. Analysis of Demographic and Health Surveys data
